# Supplementary material
Source: MDPI journal article supplement (https://www.mdpi.com/2071-1050/14/10/5986)
Supplement: s1 [file s1]

| Supplementary Table S1. Mean weekly meteorological data during the rice-growing season in 2013 and 2014 |                         |                         |                                    |                                    |                                    |                                    |                                |                                   |                       |                       |                            |                            |
|---------------------------------------------------------------------------------------------------------|-------------------------|-------------------------|------------------------------------|------------------------------------|------------------------------------|------------------------------------|--------------------------------|-----------------------------------|-----------------------|-----------------------|----------------------------|----------------------------|
| Meteorological weeks                                                                                    | Rainfall (mm)<br>(2013) | Rainfall (mm)<br>(2014) | Temperature<br>Max. (°C)<br>(2013) | Temperature<br>Max. (°C)<br>(2014) | Temperature<br>Min. (°C)<br>(2013) | Temperature<br>Min. (°C)<br>(2014) | Sunshine (hours/day)<br>(2013) | Sunshine<br>(hours/day)<br>(2014) | RH mean (%)<br>(2013) | RH mean (%)<br>(2014) | Evaporation (2013)<br>(mm) | Evaporation (2014)<br>(mm) |
| 23                                                                                                      | 9.8                     | 0.0                     | 39.5                               | 45.1                               | 29.1                               | 26.0                               | 7.4                            | 9.5                               | 62                    | 40                    | 71.8                       | 95.0                       |
| 24                                                                                                      | 68.6                    | 8.8                     | 37.0                               | 41.5                               | 23.5                               | 27.0                               | 3.4                            | 6.0                               | 76                    | 60                    | 47.2                       | 76.9                       |
| 25                                                                                                      | 68.4                    | 6.0                     | 37.0                               | 41.8                               | 25.9                               | 27.7                               | 6.3                            | 6.0                               | 65                    | 55                    | 43.7                       | 76.3                       |
| 26                                                                                                      | 4.2                     | 41.6                    | 37.3                               | 39.0                               | 26.3                               | 26.2                               | 3.4                            | 5.6                               | 71                    | 63                    | 50.7                       | 60.9                       |
| 27                                                                                                      | 4.2                     | 0.0                     | 36.0                               | 36.0                               | 26.8                               | 26.4                               | 4.0                            | 3.9                               | 76                    | 46                    | 47.8                       | 43.1                       |
| 28                                                                                                      | 173.0                   | 4.6                     | 34.8                               | 40.1                               | 25.0                               | 27.8                               | 5.1                            | 6.3                               | 81                    | 65                    | 35.9                       | 68.0                       |
| 29                                                                                                      | 165.4                   | 120.6                   | 33.9                               | 34.4                               | 25.1                               | 25.9                               | 0.8                            | 4.6                               | 87                    | 83                    | 29.7                       | 50.1                       |
| 30                                                                                                      | 70.6                    | 23.2                    | 34.1                               | 33.6                               | 25.7                               | 26.0                               | 5.3                            | 3.1                               | 83                    | 83                    | 31.2                       | 40.2                       |
| 31                                                                                                      | 54.2                    | 29.8                    | 34.0                               | 35.1                               | 26.3                               | 26.0                               | 4.1                            | 4.9                               | 86                    | 81                    | 30.9                       | 41.2                       |
| 32                                                                                                      | 125.8                   | 41.7                    | 31.3                               | 33.8                               | 25.1                               | 26.1                               | 1.5                            | 3.3                               | 92                    | 79                    | 23.9                       | 51.0                       |
| 33                                                                                                      | 196.1                   | 0.0                     | 31.7                               | 35.6                               | 24.3                               | 25.7                               | 1.6                            | 6.5                               | 95                    | 71                    | 21.6                       | 48.6                       |
| 34                                                                                                      | 145.4                   | 0.0                     | 33.7                               | 38.1                               | 24.7                               | 26.0                               | 5.5                            | 5.8                               | 87                    | 59                    | 29.2                       | 60.4                       |
| 35                                                                                                      | 47.0                    | 76.6                    | 34.0                               | 35.3                               | 25.4                               | 24.8                               | 4.6                            | 4.6                               | 77                    | 78                    | 43.7                       | 42.3                       |
| 36                                                                                                      | 3.2                     | 89.6                    | 35.1                               | 32.3                               | 24.6                               | 24.3                               | 7.9                            | 3.8                               | 67                    | 82                    | 48.4                       | 33.8                       |
| 37                                                                                                      | 3.0                     | 9.3                     | 35.7                               | 33.2                               | 24.0                               | 23.5                               | 7.2                            | 6.0                               | 75                    | 79                    | 35.6                       | 34.0                       |
| 38                                                                                                      | 51.1                    | 0.0                     | 34.4                               | 35.2                               | 23.0                               | 24.4                               | 7.2                            | 9.1                               | 77                    | 61                    | 38.9                       | 44.4                       |
| 39                                                                                                      | 50.8                    | 0.0                     | 33.2                               | 35.7                               | 24.0                               | 23.4                               | 4.8                            | 9.3                               | 81                    | 56                    | 41.8                       | 44.4                       |
| 40                                                                                                      | 0.4                     | 0.0                     | 31.3                               | 36.7                               | 22.9                               | 23.2                               | 5.6                            | 7.9                               | 80                    | 59                    | 30.3                       | 47.1                       |
| 41                                                                                                      | 108.6                   | 0.0                     | 31.8                               | 33.9                               | 22.1                               | 20.0                               | 5.6                            | 7.3                               | 81                    | 58                    | 30.5                       | 37.0                       |
| 42                                                                                                      | 0.0                     | 0.0                     | 32.2                               | 30.4                               | 18.1                               | 15.5                               | 7.0                            | 7.2                               | 71                    | 61                    | 28.1                       | 29.3                       |
| 43                                                                                                      | 0.0                     | 0.0                     | 30.8                               | 32.1                               | 16.1                               | 17.4                               | 3.3                            | 2.8                               | 71                    | 68                    | 20.5                       | 24.2                       |
| 44                                                                                                      | 0.0                     | 0.0                     | 29.8                               | 30.8                               | 13.9                               | 15.6                               | 4.6                            | 3.8                               | 69                    | 59                    | 24.6                       | 26.9                       |

Note- rainfall and evaporation data is the sum of the total for each meteorological week; while other values are the average for a particular week

| Supplementary Table S2. Mean weekly meteorological data during the wheat growing season in 2013-14 and 2014-15 |                         |                         |                                |                                |                                |                                |                                |                                |                       |                       |                            |                            |
|----------------------------------------------------------------------------------------------------------------|-------------------------|-------------------------|--------------------------------|--------------------------------|--------------------------------|--------------------------------|--------------------------------|--------------------------------|-----------------------|-----------------------|----------------------------|----------------------------|
| Meteorological weeks                                                                                           | Rainfall (mm) (2013-14) | Rainfall (mm) (2014-15) | Temperature Max.(°C) (2013-14) | Temperature Max.(°C) (2014-15) | Temperature Min.(°C) (2013-14) | Temperature Min.(°C) (2014-15) | Sunshine (hours/day) (2013-14) | Sunshine (hours/day) (2014-15) | RH mean (%) (2013-14) | RH mean (%) (2014-15) | Evaporation (mm) (2013-14) | Evaporation (mm) (2014-15) |
| 45                                                                                                             | 0.4                     | 0.0                     | 25.8                           | 30.4                           | 11.8                           | 15.2                           | 1.8                            | 4.7                            | 78                    | 60                    | 18.7                       | 32.9                       |
| 46                                                                                                             | 0.0                     | 0.0                     | 25.9                           | 27.0                           | 7.4                            | 8.0                            | 6.0                            | 6.0                            | 66                    | 61                    | 22.8                       | 26.6                       |
| 47                                                                                                             | 0.0                     | 0.0                     | 26.9                           | 27.0                           | 8.4                            | 7.1                            | 5.7                            | 6.6                            | 69                    | 65                    | 19.6                       | 25.9                       |
| 48                                                                                                             | 0.0                     | 0.0                     | 27.8                           | 27.9                           | 8.9                            | 10.4                           | 7.4                            | 6.5                            | 64                    | 60                    | 23.0                       | 27.0                       |
| 49                                                                                                             | 0.0                     | 0.0                     | 25.7                           | 27.0                           | 7.2                            | 9.0                            | 4.4                            | 7.7                            | 69                    | 68                    | 16.4                       | 24.5                       |
| 50                                                                                                             | 0.0                     | 26.4                    | 24.0                           | 21.3                           | 7.5                            | 7.7                            | 5.9                            | 4.1                            | 69                    | 71                    | 17.0                       | 19.4                       |
| 51                                                                                                             | 0.0                     | 0.0                     | 19.9                           | 16.0                           | 9.4                            | 5.7                            | 0.4                            | 2.3                            | 87                    | 69                    | 9.7                        | 11.2                       |
| 52                                                                                                             | 1.9                     | 0.0                     | 18.9                           | 16.3                           | 4.7                            | 3.4                            | 4.9                            | 2.8                            | 76                    | 66.0                  | 16.5                       | 12.8                       |
| 1                                                                                                              | 0.0                     | 18.6                    | 17.7                           | 17.9                           | 4.8                            | 8.7                            | 2.1                            | 1.8                            | 77                    | 80                    | 13.4                       | 12.6                       |
| 2                                                                                                              | 0.0                     | 1.4                     | 19.6                           | 15.1                           | 4.3                            | 5.2                            | 2.8                            | 1.3                            | 76                    | 73                    | 14.3                       | 15.4                       |
| 3                                                                                                              | 5.8                     | 0.0                     | 17.7                           | 18.5                           | 8.5                            | 5.3                            | 2.0                            | 2.9                            | 89                    | 61                    | 11.4                       | 11.9                       |
| 4                                                                                                              | 12.8                    | 15.4                    | 18.1                           | 16.1                           | 9.1                            | 9.1                            | 1.9                            | 1.1                            | 86                    | 85                    | 12.6                       | 10.3                       |
| 5                                                                                                              | 0.0                     | 0.0                     | 21.6                           | 20.0                           | 7.8                            | 7.6                            | 2.6                            | 5.4                            | 79                    | 71                    | 15.6                       | 15.9                       |
| 6                                                                                                              | 1.6                     | 0.0                     | 21.7                           | 22.6                           | 7.8                            | 6.7                            | 4.3                            | 7.1                            | 76                    | 66                    | 21.6                       | 17.2                       |
| 7                                                                                                              | 53.0                    | 0.0                     | 19.0                           | 24.7                           | 6.1                            | 10.1                           | 5.4                            | 5.3                            | 82                    | 72                    | 14.5                       | 22.1                       |
| 8                                                                                                              | 0.0                     | 0.0                     | 23.5                           | 27.4                           | 7.2                            | 15.1                           | 4.5                            | 3.4                            | 81                    | 75                    | 16.5                       | 31.0                       |
| 9                                                                                                              | 47.6                    | 135.4                   | 24.0                           | 23.7                           | 9.8                            | 11.7                           | 4.1                            | 3.8                            | 81                    | 74                    | 19.9                       | 18.9                       |
| 10                                                                                                             | 3.9                     | 45.0                    | 23.9                           | 24.1                           | 11.1                           | 9.6                            | 6.4                            | 7.2                            | 73                    | 71                    | 29.4                       | 27.6                       |
| 11                                                                                                             | 7.8                     | 0.0                     | 27.8                           | 25.5                           | 12.1                           | 12.9                           | 8.3                            | 4.9                            | 68                    | 54                    | 27.4                       | 27.3                       |
| 12                                                                                                             | 4.4                     | 0.0                     | 28.8                           | 29.7                           | 13.8                           | 13.5                           | 7.0                            | 9.6                            | 67                    | 39                    | 24.9                       | 42.0                       |
| 13                                                                                                             | 8.4                     | 21.0                    | 30.9                           | 32.9                           | 16.3                           | 17.8                           | 5.6                            | 6.6                            | 60                    | 46                    | 31.1                       | 32.2                       |
| 14                                                                                                             | 0.0                     | 45.4                    | 33.8                           | 30.2                           | 17.1                           | 17.0                           | 8.8                            | 6.5                            | 59                    | 45                    | 41.5                       | 31.5                       |
| 15                                                                                                             | 0.0                     | 0.0                     | 24.0                           | 31.9                           | 20.4                           | 17.7                           | 8.9                            | 7.2                            | 58                    | 46                    | 46.7                       | 35.0                       |

Note- rainfall and evaporation data is sum of the total for each meteorological week; while other values are the average for a particular week
